# Supplementary material for: Nutritional Performance of Five Citrus Rootstocks under Different Fe Levels
Source: MDPI journal article supplement (doi:10.3390/plants12183252), 2023-09-13
Supplement: s1 [file s1]

# Supplementary Information

**Table S1:** Shoot and root dry weight (DW in g), root to shoot ratio (in DW basis), and total DW of five citrus rootstocks at the beginning of the experiment.

| Rootstock             | Initial Leaf<br>CHL<br>( $\mu\text{mol m}^{-2}$ ) | Shoot DW<br>(g) | Root DW<br>(g)  | Root/Shoot      | Total DW<br>(g) |
|-----------------------|---------------------------------------------------|-----------------|-----------------|-----------------|-----------------|
| Sour orange           | 349.9 $\pm$ 78.0                                  | 0.66 $\pm$ 0.07 | 0.20 $\pm$ 0.02 | 0.31 $\pm$ 0.14 | 0.87 $\pm$ 0.04 |
| Carrizo citrange      | 455.9 $\pm$ 73.5                                  | 0.40 $\pm$ 0.02 | 0.22 $\pm$ 0.01 | 0.55 $\pm$ 0.10 | 0.62 $\pm$ 0.02 |
| <i>C. macrophylla</i> | 399.9 $\pm$ 63.1                                  | 0.30 $\pm$ 0.02 | 0.09 $\pm$ 0.01 | 0.30 $\pm$ 0.07 | 0.39 $\pm$ 0.01 |
| Troyer citrange       | 460.2 $\pm$ 93.1                                  | 0.29 $\pm$ 0.02 | 0.18 $\pm$ 0.01 | 0.62 $\pm$ 0.13 | 0.47 $\pm$ 0.02 |
| Volkamer lemon        | 387.1 $\pm$ 70.1                                  | 0.36 $\pm$ 0.02 | 0.12 $\pm$ 0.01 | 0.35 $\pm$ 0.08 | 0.48 $\pm$ 0.02 |

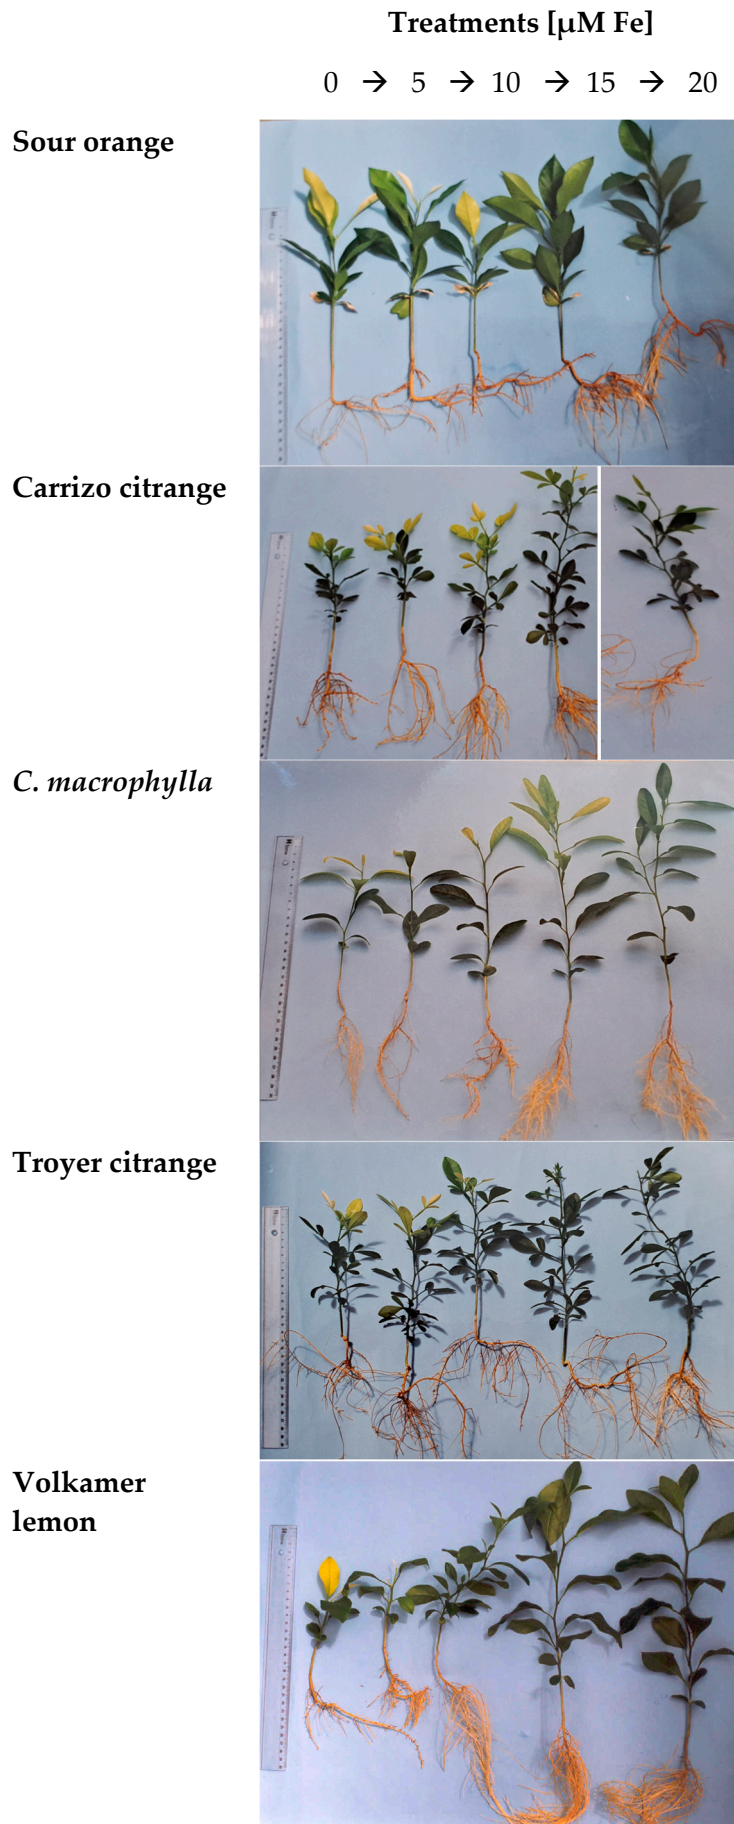

**Figure S1:** Aspect of citrus rootstocks plants for each treatment at the end of the experiment.

**Table S2:** Loadings of the PCA for nutrient composition and leaf chlorosis parameters for five citrus rootstocks. Significant values are in bold.

| Variables | PC1          | PC2           |
|-----------|--------------|---------------|
| CHL       | 0.344        | <b>0.635</b>  |
| FCR       | 0.373        | 0.016         |
| Leaf area | -0.179       | <b>0.888</b>  |
| S-DW      | -0.309       | <b>0.814</b>  |
| N-S       | <b>0.834</b> | 0.276         |
| P-S       | <b>0.758</b> | 0.037         |
| Ca-S      | <b>0.839</b> | 0.083         |
| Mg-S      | 0.562        | 0.010         |
| K-S       | 0.498        | -0.355        |
| Fe-S      | 0.498        | 0.483         |
| Cu-S      | <b>0.775</b> | -0.400        |
| Zn-S      | <b>0.834</b> | -0.266        |
| Mn-S      | <b>0.885</b> | -0.261        |
| N-R       | -0.155       | 0.358         |
| P-R       | 0.215        | 0.535         |
| Ca-R      | -0.282       | 0.519         |
| Mg-R      | 0.476        | <b>0.636</b>  |
| K-R       | 0.620        | 0.410         |
| Fe-R      | 0.070        | 0.141         |
| Cu-R      | 0.085        | <b>-0.778</b> |
| Zn-R      | <b>0.757</b> | -0.090        |
| Mn-R      | <b>0.678</b> | 0.212         |
| R-DW      | 0.007        | 0.606         |

**Table S3:** Pearson's correlations between PCA variables: leaf chlorosis parameters and nutrients in shoots (S) and in roots (R) of five citrus rootstocks.

|           | CHL            | FCR            | N-S            | P-S            | Ca-S           | Mg-S           | K-S            | Fe-S           | Cu-S            | Zn-S           | Mn-S           | N-R    | P-R            | Ca-R          | Mg-R           | K-R            | Fe-R   | Cu-R            | Zn-R   | Mn-R   | R-DW           | S-DW           | Leaf area |
|-----------|----------------|----------------|----------------|----------------|----------------|----------------|----------------|----------------|-----------------|----------------|----------------|--------|----------------|---------------|----------------|----------------|--------|-----------------|--------|--------|----------------|----------------|-----------|
| CHL       | 1              |                |                |                |                |                |                |                |                 |                |                |        |                |               |                |                |        |                 |        |        |                |                |           |
| FCR       | 0.196          | 1              |                |                |                |                |                |                |                 |                |                |        |                |               |                |                |        |                 |        |        |                |                |           |
| N-S       | 0.399*         | 0.183          | 1              |                |                |                |                |                |                 |                |                |        |                |               |                |                |        |                 |        |        |                |                |           |
| P-S       | 0.326          | 0.242          | <b>0.700**</b> | 1              |                |                |                |                |                 |                |                |        |                |               |                |                |        |                 |        |        |                |                |           |
| Ca-S      | 0.288          | 0.292          | <b>0.763**</b> | <b>0.536**</b> | 1              |                |                |                |                 |                |                |        |                |               |                |                |        |                 |        |        |                |                |           |
| Mg-S      | 0.092          | -0.011         | <b>0.654**</b> | <b>0.609**</b> | <b>0.587**</b> | 1              |                |                |                 |                |                |        |                |               |                |                |        |                 |        |        |                |                |           |
| K-S       | -0.058         | <b>0.627**</b> | 0.112          | 0.277          | 0.376          | -0.105         | 1              |                |                 |                |                |        |                |               |                |                |        |                 |        |        |                |                |           |
| Fe-S      | <b>0.562**</b> | -0.014         | <b>0.473*</b>  | 0.217          | <b>0.466*</b>  | -0.033         | 0.161          | 1              |                 |                |                |        |                |               |                |                |        |                 |        |        |                |                |           |
| Cu-S      | 0.123          | 0.192          | <b>0.484*</b>  | <b>0.543**</b> | <b>0.560**</b> | 0.252          | <b>0.633**</b> | 0.366          | 1               |                |                |        |                |               |                |                |        |                 |        |        |                |                |           |
| Zn-S      | 0.036          | 0.261          | <b>0.704**</b> | <b>0.706**</b> | <b>0.684**</b> | <b>0.684**</b> | 0.309          | 0.108          | <b>0.614**</b>  | 1              |                |        |                |               |                |                |        |                 |        |        |                |                |           |
| Mn-S      | 0.083          | <b>0.405*</b>  | <b>0.720**</b> | <b>0.656**</b> | <b>0.761**</b> | <b>0.532**</b> | <b>0.530**</b> | 0.228          | <b>0.698**</b>  | <b>0.840**</b> | 1              |        |                |               |                |                |        |                 |        |        |                |                |           |
| N-R       | 0.088          | -0.012         | 0.049          | -0.257         | -0.059         | <b>-0.454*</b> | -0.178         | 0.177          | -0.248          | -0.272         | -0.162         | 1      |                |               |                |                |        |                 |        |        |                |                |           |
| P-R       | 0.288          | 0.018          | 0.292          | 0.374          | 0.024          | 0.083          | 0.021          | 0.272          | -0.014          | 0.033          | 0.020          | 0.094  | 1              |               |                |                |        |                 |        |        |                |                |           |
| Ca-R      | 0.052          | 0.031          | -0.102         | -0.209         | -0.220         | -0.282         | -0.130         | 0.033          | <b>-0.441*</b>  | -0.381         | -0.295         | 0.358  | 0.677**        | 1             |                |                |        |                 |        |        |                |                |           |
| Mg-R      | 0.382          | 0.173          | <b>0.452*</b>  | 0.199          | <b>0.434*</b>  | 0.150          | 0.132          | <b>0.552**</b> | 0.085           | 0.210          | 0.231          | 0.250  | <b>0.637**</b> | <b>0.456*</b> | 1              |                |        |                 |        |        |                |                |           |
| K-R       | <b>0.511**</b> | 0.236          | <b>0.482*</b>  | 0.245          | <b>0.590**</b> | 0.119          | 0.231          | <b>0.756**</b> | <b>0.451*</b>   | 0.277          | 0.315          | 0.163  | 0.103          | -0.165        | <b>0.653**</b> | 1              |        |                 |        |        |                |                |           |
| Fe-R      | 0.284          | 0.023          | -0.056         | 0.033          | -0.199         | -0.318         | 0.244          | 0.443*         | 0.170           | -0.127         | -0.051         | -0.126 | 0.042          | -0.022        | 0.139          | 0.238          | 1      |                 |        |        |                |                |           |
| Cu-R      | <b>-0.528*</b> | 0.066          | -0.244         | -0.129         | 0.046          | -0.139         | <b>0.415*</b>  | -0.263         | 0.410*          | 0.159          | 0.307          | -0.141 | -0.288         | -0.246        | -0.287         | -0.153         | -0.318 | 1               |        |        |                |                |           |
| Zn-R      | 0.186          | 0.138          | <b>0.657**</b> | <b>0.618**</b> | <b>0.455*</b>  | <b>0.493*</b>  | 0.119          | 0.169          | <b>0.569**</b>  | <b>0.771**</b> | <b>0.632**</b> | -0.020 | 0.230          | -0.288        | 0.394          | <b>0.428*</b>  | -0.047 | 0.106           | 1      |        |                |                |           |
| Mn-R      | 0.323          | 0.388          | <b>0.489*</b>  | 0.311          | <b>0.551**</b> | 0.014          | <b>0.512**</b> | <b>0.604**</b> | <b>0.475*</b>   | 0.329          | <b>0.619**</b> | 0.125  | 0.264          | -0.004        | <b>0.557**</b> | <b>0.583**</b> | 0.236  | 0.136           | 0.386  | 1      |                |                |           |
| R-DW      | 0.225          | -0.023         | 0.286          | 0.177          | 0.160          | <b>0.555**</b> | <b>-0.419*</b> | -0.021         | -0.393          | 0.032          | -0.099         | -0.150 | 0.290          | 0.177         | 0.240          | 0.037          | -0.350 | <b>-0.534**</b> | -0.070 | -0.049 | 1              |                |           |
| S-DW      | <b>0.423*</b>  | -0.017         | -0.023         | -0.189         | -0.081         | -0.089         | <b>-0.479*</b> | 0.113          | <b>-0.599**</b> | <b>-0.437*</b> | <b>-0.465*</b> | 0.356  | 0.187          | 0.345         | 0.260          | 0.198          | -0.154 | <b>-0.600**</b> | -0.338 | -0.042 | <b>0.658**</b> | 1              |           |
| Leaf area | <b>0.505*</b>  | 0.102          | 0.075          | -0.091         | -0.083         | -0.078         | -0.324         | 0.302          | <b>-0.492*</b>  | <b>-0.412*</b> | -0.346         | 0.239  | 0.284          | 0.377         | 0.394          | 0.261          | 0.199  | <b>-0.739**</b> | -0.309 | 0.119  | <b>0.615**</b> | <b>0.817**</b> | 1         |

\* Significant difference at P < 0.05. \*\*. Significant difference at P < 0.01.

**Table S4:** Macronutrients (mg) and micronutrients (µg) contents at the end of the experiment in five citrus rootstocks grown with five Fe concentrations in nutrient solution: 0, 5, 10, 15 and 20 µM.

| Treatments<br>[µM Fe]        | N    | P    | Ca   | Mg   | K    | Fe    | Cu    | Zn    | Mn    |
|------------------------------|------|------|------|------|------|-------|-------|-------|-------|
| <b>Sour orange</b>           |      |      |      |      |      |       |       |       |       |
| 0                            | 49.5 | 2.7  | 18.3 | 5.7  | 12.7 | 67.7  | 45.7  | 57.9  | 74.1  |
| 5                            | 66.8 | 2.7  | 19.3 | 5.4  | 19.5 | 69.1  | 46.0  | 64.4  | 70.7  |
| 10                           | 68.9 | 4.0  | 22.8 | 7.3  | 20.1 | 98.0  | 48.5  | 81.4  | 71.8  |
| 15                           | 67.5 | 11.2 | 35.6 | 20.3 | 23.8 | 136.9 | 46.9  | 92.9  | 296.3 |
| 20                           | 66.6 | 7.4  | 23.4 | 9.4  | 22.0 | 162.6 | 33.1  | 73.8  | 329.7 |
| <b>Carrizo citrange</b>      |      |      |      |      |      |       |       |       |       |
| 0                            | 30.4 | 3.4  | 10.9 | 2.6  | 10.5 | 54.4  | 60.0  | 73.2  | 95.9  |
| 5                            | 40.4 | 5.0  | 14.0 | 3.4  | 13.9 | 72.3  | 57.3  | 153.0 | 176.7 |
| 10                           | 40.8 | 7.8  | 11.0 | 3.0  | 15.2 | 80.7  | 65.2  | 161.7 | 207.1 |
| 15                           | 54.9 | 6.4  | 22.0 | 8.3  | 17.0 | 81.2  | 46.3  | 133.1 | 250.5 |
| 20                           | 47.7 | 7.3  | 18.8 | 3.4  | 18.7 | 128.9 | 43.6  | 117.5 | 367.9 |
| <b><i>C. macrophylla</i></b> |      |      |      |      |      |       |       |       |       |
| 0                            | 28.7 | 1.7  | 13.4 | 2.2  | 18.8 | 49.3  | 80.8  | 60.1  | 281.0 |
| 5                            | 18.8 | 1.1  | 6.7  | 2.1  | 11.4 | 75.3  | 31.4  | 29.4  | 64.3  |
| 10                           | 26.7 | 1.1  | 7.8  | 2.3  | 13.1 | 92.4  | 33.7  | 38.9  | 49.7  |
| 15                           | 43.6 | 10.0 | 19.8 | 5.8  | 29.2 | 117.3 | 50.0  | 62.3  | 145.2 |
| 20                           | 36.2 | 2.9  | 15.2 | 4.9  | 19.4 | 94.6  | 40.7  | 45.5  | 112.2 |
| <b>Troyer citrange</b>       |      |      |      |      |      |       |       |       |       |
| 0                            | 39.0 | 4.2  | 15.2 | 4.5  | 15.8 | 57.3  | 136.2 | 117.4 | 194.8 |
| 5                            | 43.1 | 3.9  | 16.3 | 5.1  | 18.4 | 86.6  | 54.0  | 88.9  | 101.5 |
| 10                           | 50.1 | 4.8  | 21.5 | 6.3  | 23.3 | 119.4 | 41.7  | 87.6  | 253.7 |
| 15                           | 63.3 | 6.0  | 24.8 | 7.2  | 26.6 | 118.6 | 31.6  | 114.3 | 147.6 |
| 20                           | 57.3 | 6.4  | 26.9 | 6.2  | 24.6 | 167.2 | 53.8  | 114.2 | 310.2 |
| <b>Volkamer lemon</b>        |      |      |      |      |      |       |       |       |       |
| 0                            | 27.8 | 2.3  | 15.8 | 4.0  | 15.1 | 56.7  | 65.7  | 47.0  | 71.8  |
| 5                            | 44.6 | 3.6  | 15.7 | 3.2  | 20.1 | 77.2  | 58.7  | 98.7  | 135.3 |
| 10                           | 55.4 | 5.7  | 21.7 | 3.8  | 25.6 | 124.3 | 49.4  | 175.7 | 401.1 |
| 15                           | 71.7 | 6.6  | 32.3 | 6.3  | 31.3 | 176.9 | 54.2  | 147.6 | 233.5 |
| 20                           | 83.7 | 6.7  | 31.7 | 5.7  | 33.0 | 241.1 | 55.8  | 93.5  | 494.9 |

**Table S5:** Loadings of the PCA for total nutrient content and leaf parameters for five Fe levels in nutrient solution considering rootstocks as one. DW – total dry weight (shoot plus root). Significant values are in bold.

| Variables | PC1           | PC2          |
|-----------|---------------|--------------|
| CHL       | <b>0.971</b>  | 0.240        |
| FCR       | -0.053        | <b>0.999</b> |
| Leaf area | <b>0.971</b>  | 0.240        |
| DW        | <b>0.929</b>  | 0.370        |
| N         | <b>0.929</b>  | 0.370        |
| P         | <b>0.929</b>  | 0.370        |
| Ca        | 0.552         | <b>0.833</b> |
| Mg        | <b>0.929</b>  | 0.370        |
| K         | <b>0.929</b>  | 0.370        |
| Fe        | <b>0.971</b>  | 0.240        |
| Cu        | <b>-0.941</b> | -0.339       |
| Zn        | <b>0.979</b>  | -0.204       |
| Mn        | 0.570         | <b>0.821</b> |
